# Supplementary material
Source: ML conference proceedings conference paper supplement (https://openaccess.thecvf.com/content/ICCV2023/html/Zhao_MagicFusion_Boosting_Text-to-Image_ICCV_2023_paper.html)
Supplement: Supplementary file 1 [file Zhao_MagicFusion_Boosting_Text-to-Image_ICCV_2023_supplemental.pdf]

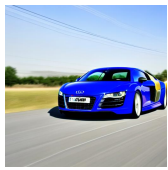

blue front-side sports  
Audi sport Audi R8 2007  
4.2 FSI Quattro

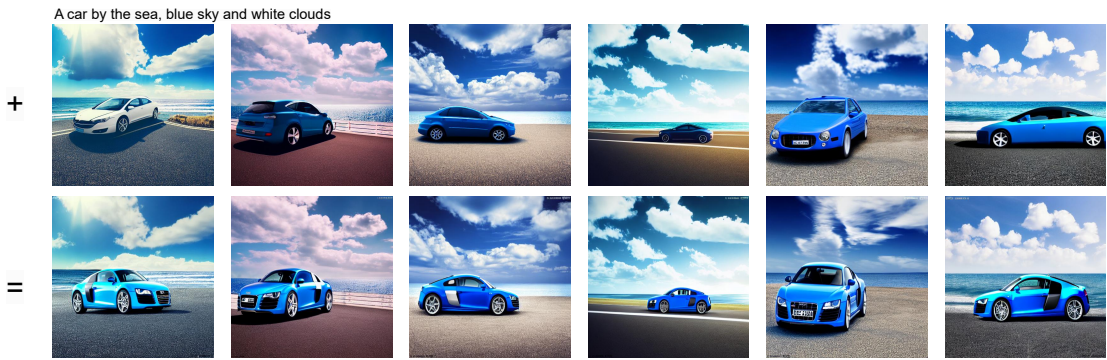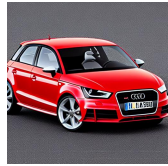

red front-side hatchback  
Audi (imported) Audi A1  
2010 e-tron

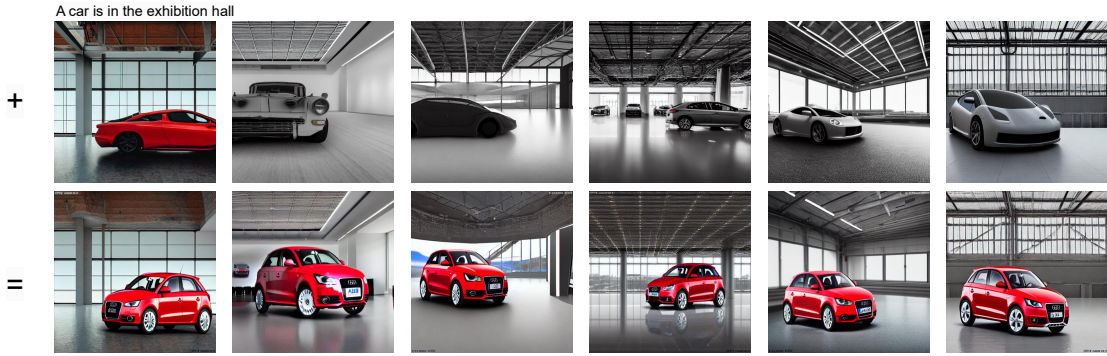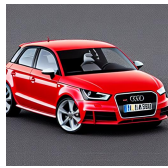

red front-side hatchback  
Audi (imported) Audi A1  
2010 e-tron

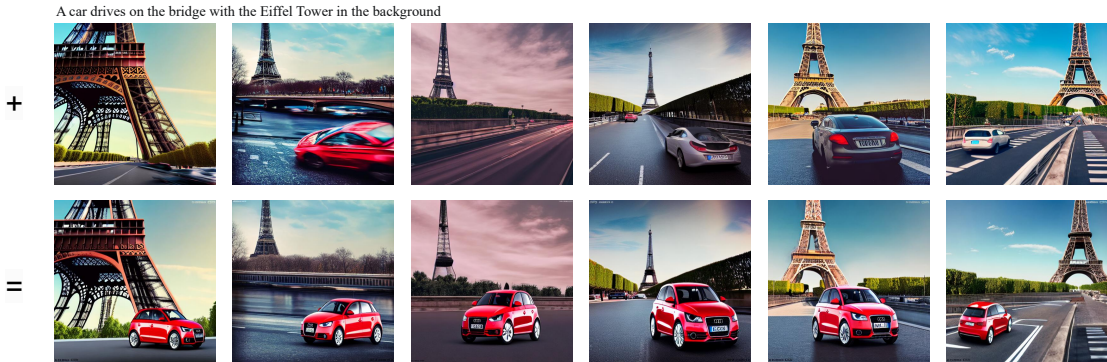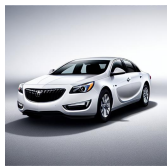

white front-side sedan  
SAIC GM Buick Regal  
2017 30h luxury

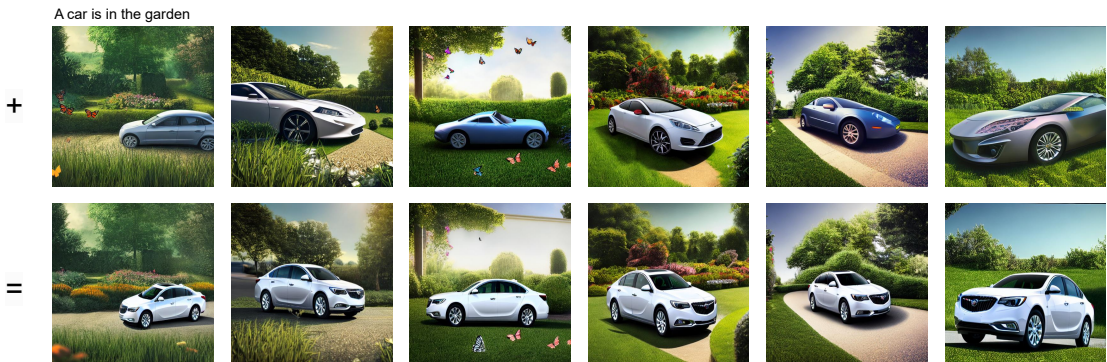

Figure 1: Supplementary experimental results for Application 1.

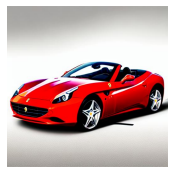

red front-side hardtop convertible Ferrari California t 2009 4.3L standard

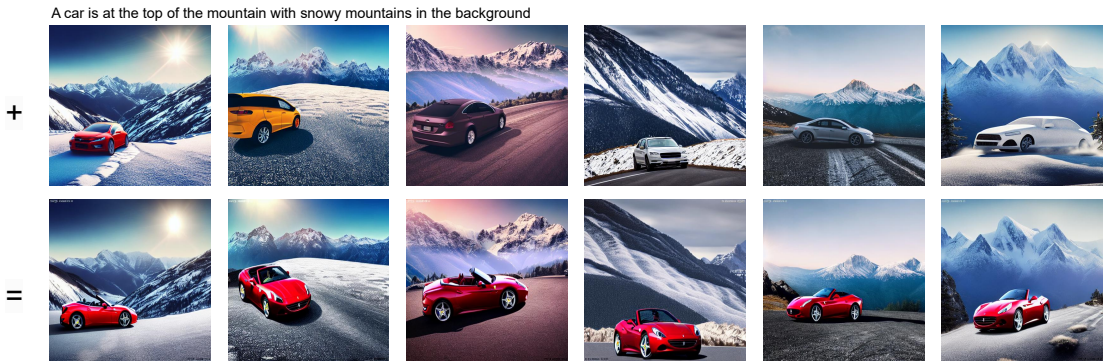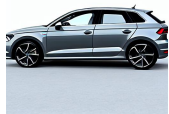

gray front-side hatchback FAW Volkswagen Audi A3 2018 30th anniversary Sportback 35 TFSI sport

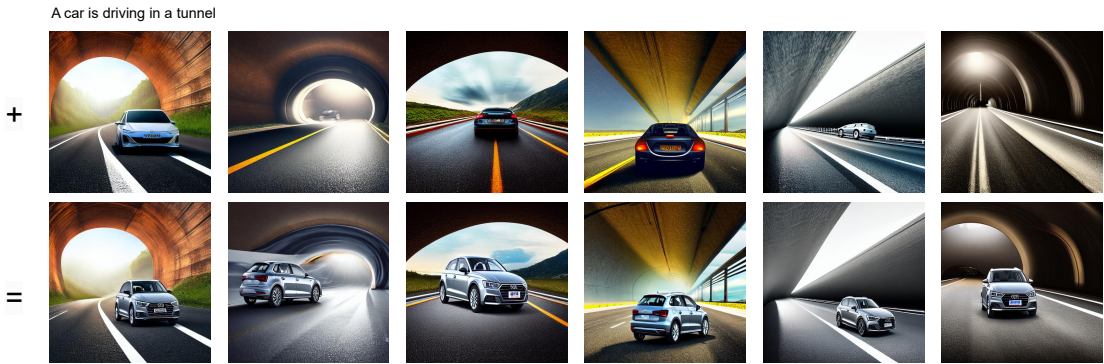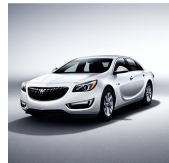

white front-side sedan SAIC GM Buick Regal 2017 30h luxury

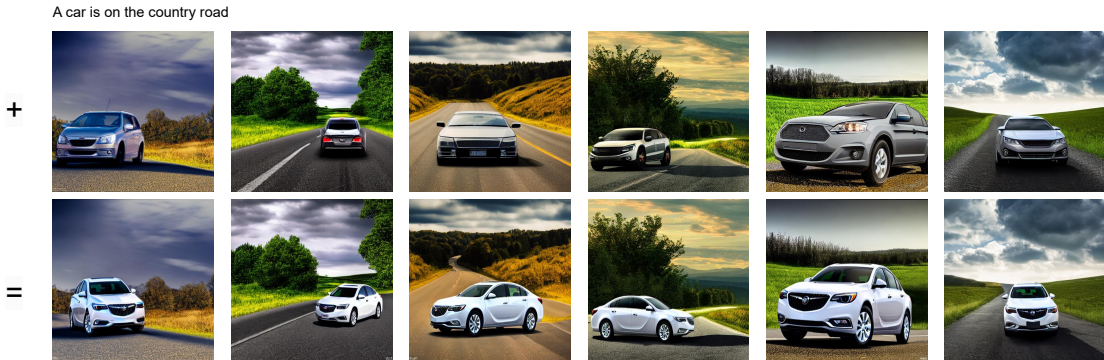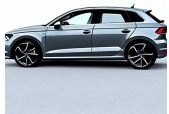

gray front-side hatchback FAW Volkswagen Audi A3 2018 30th anniversary Sportback 35 TFSI sport

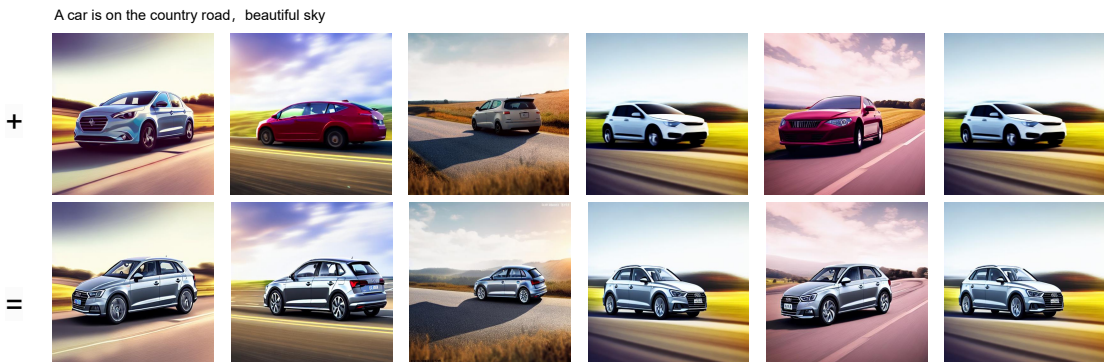

Figure 2: Supplementary experimental results for Application 1.

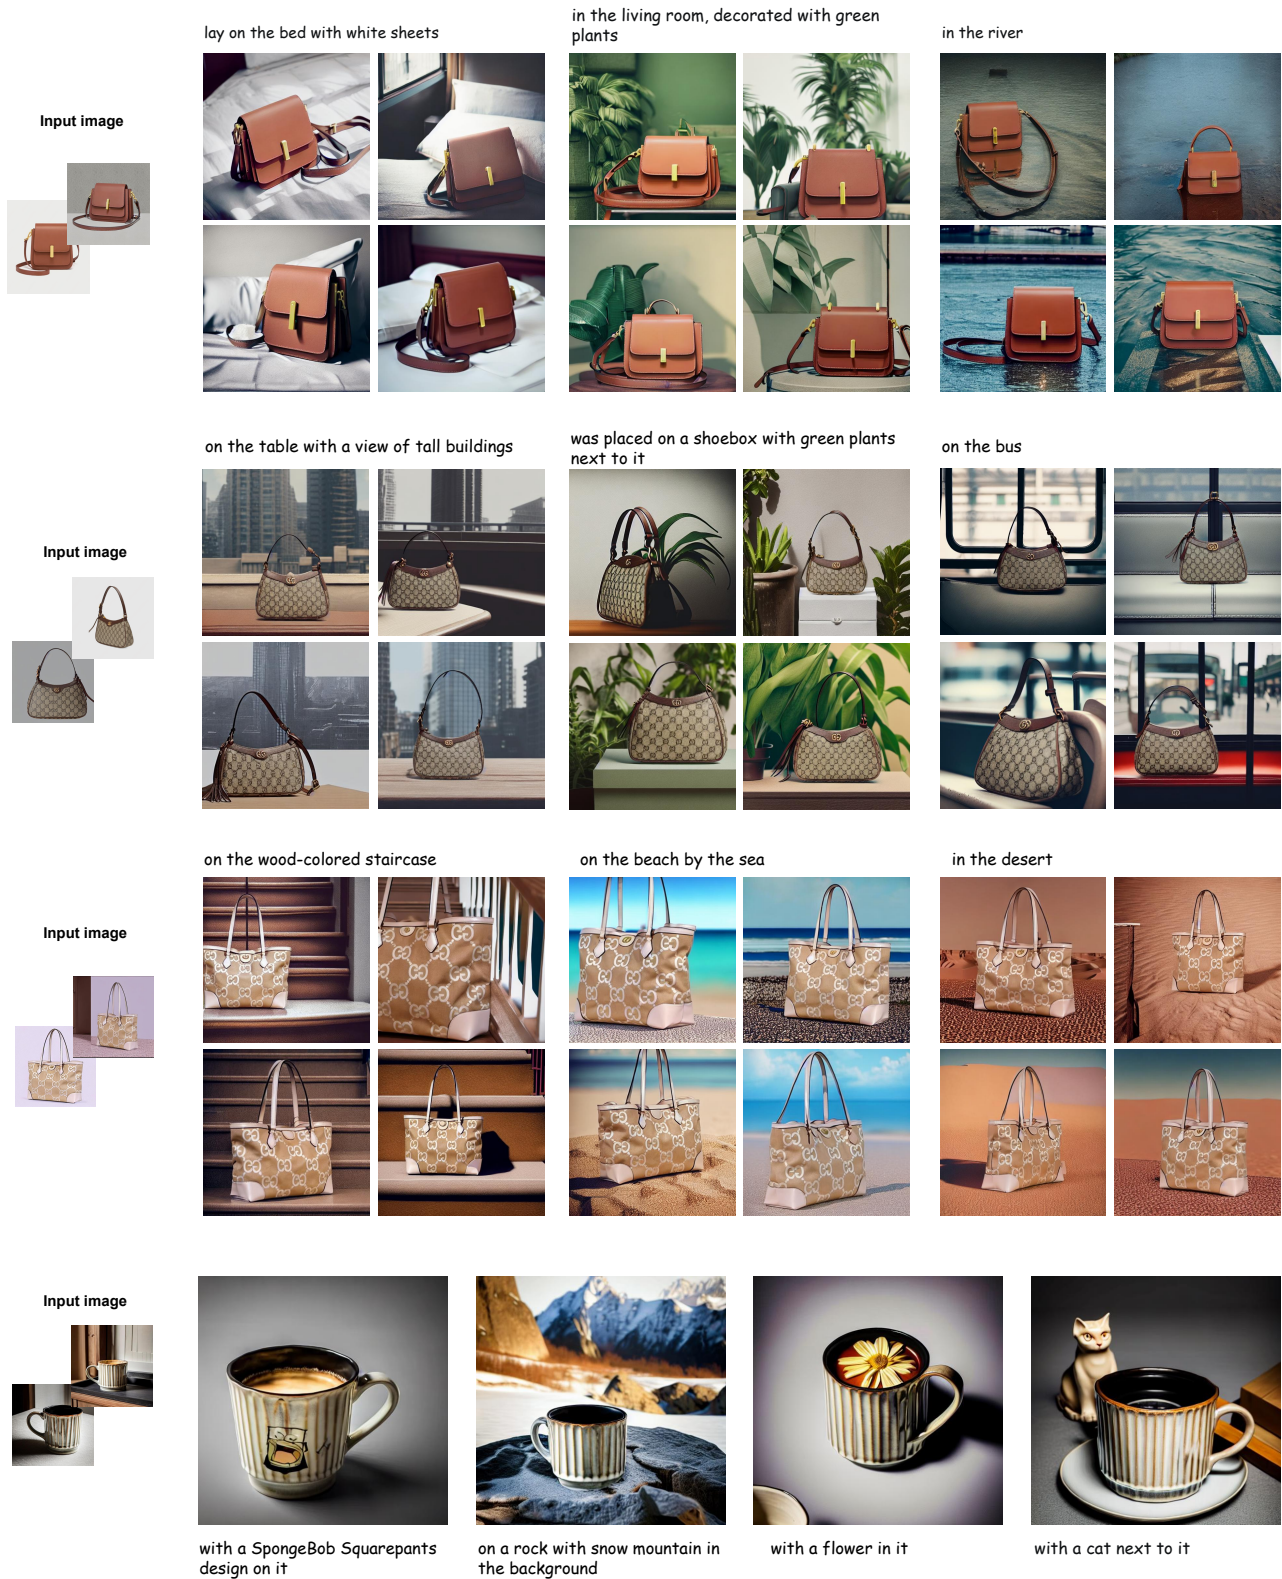

Figure 3: Supplementary experimental results for Application 2.

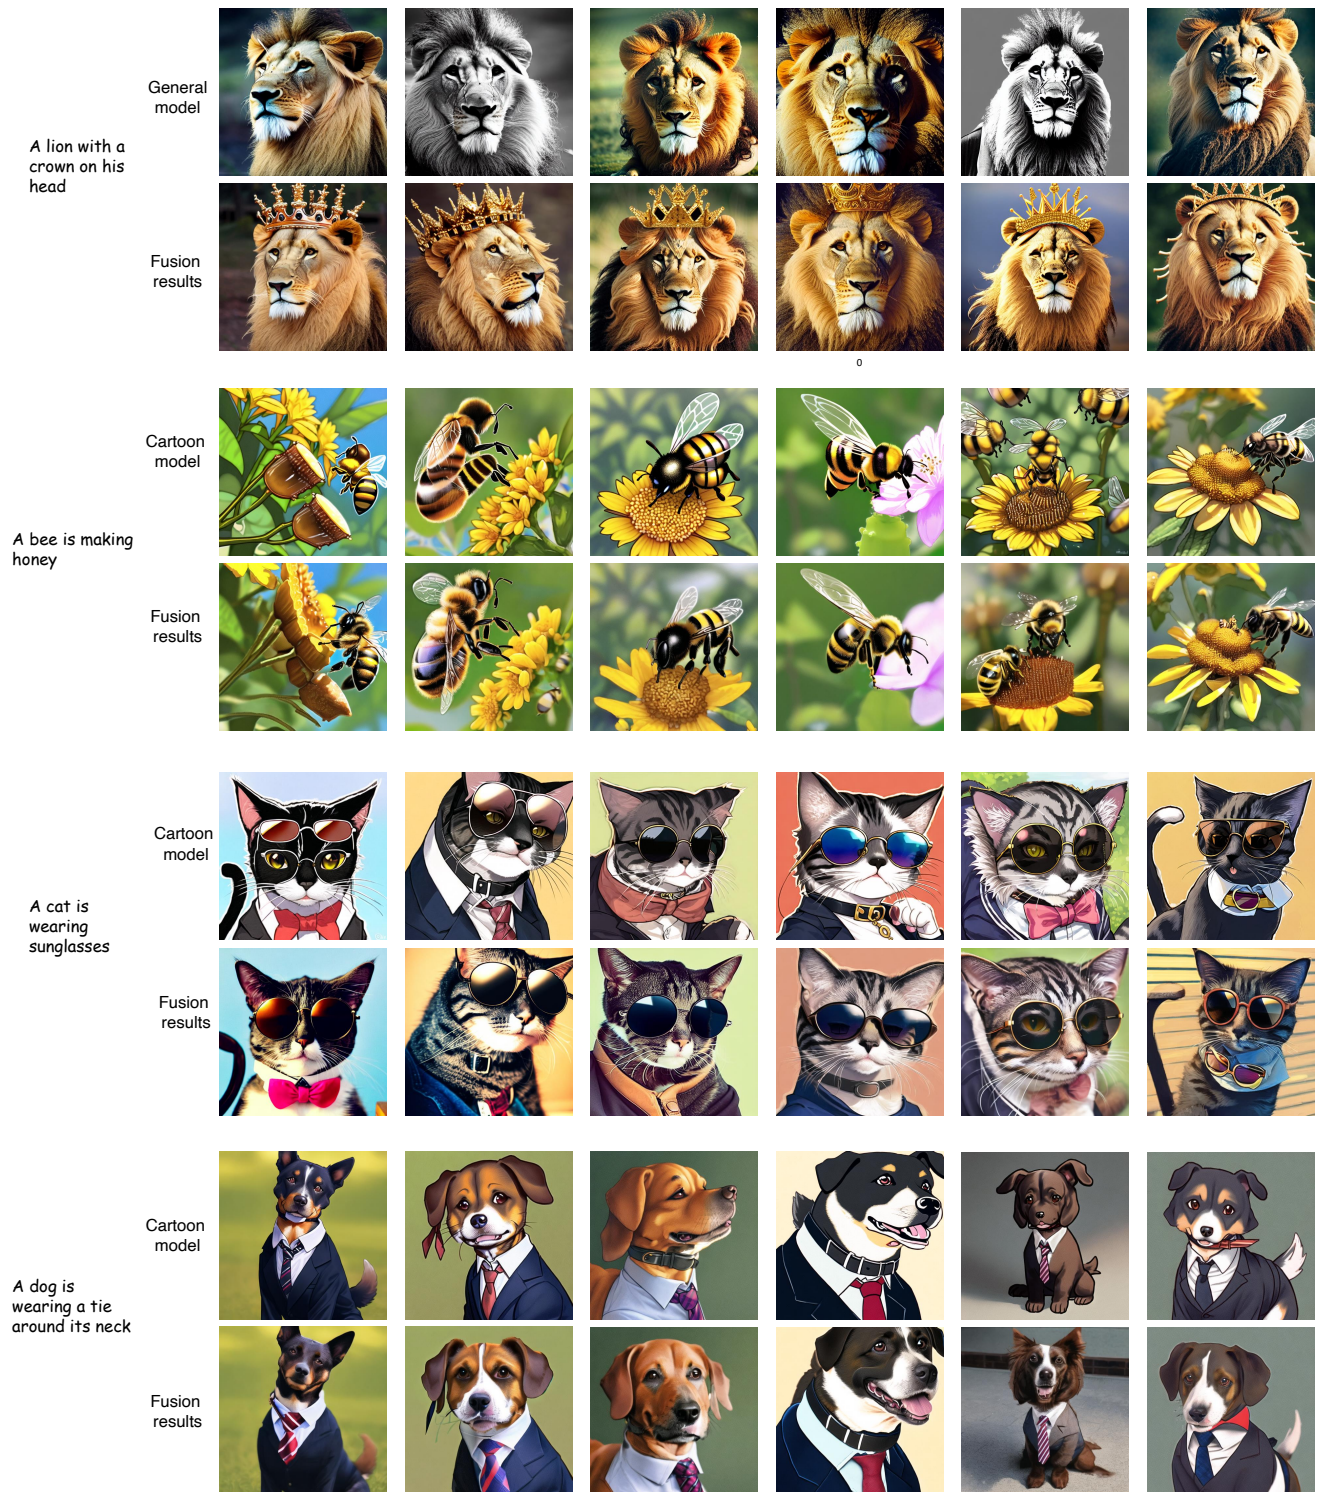

Figure 4: Supplementary experimental results for Application 3.

The big wolf is on the grassland, looking at the distant mountain peaks

Cartoon model

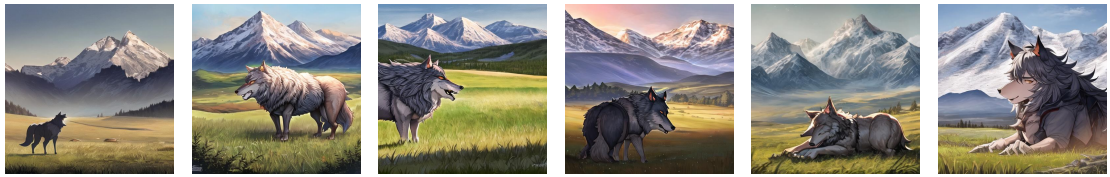

Fusion results

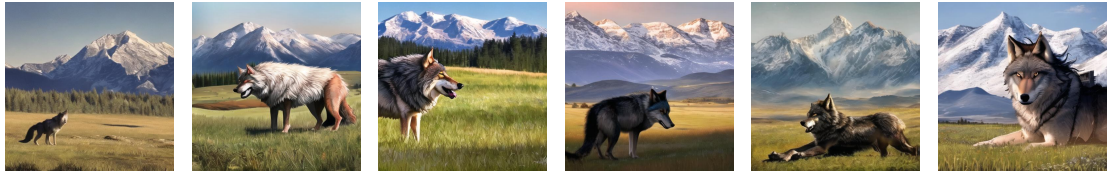

A mouse is stealing corn

Cartoon model

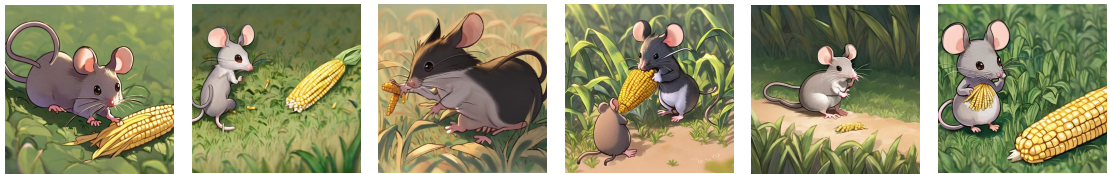

Fusion results

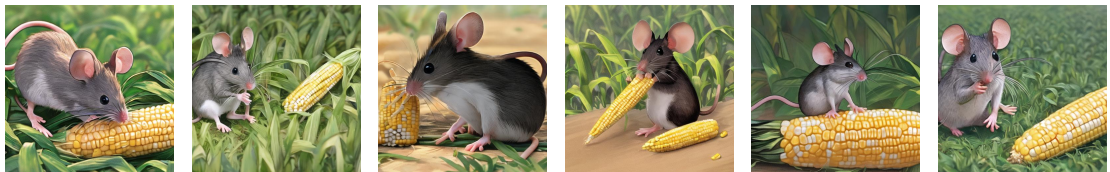

Figure 5: Supplementary experimental results for Application 3.
